# Supplementary material for: Trophic level drives the host microbiome of soil invertebrates at a continental scale
Source: PubMed Central journal article supplement (PMC8454154; doi:10.1186/s40168-021-01144-4), 2021-09-20
Supplement: 40168_2021_1144_MOESM4_ESM.pdf [file 40168_2021_1144_MOESM4_ESM.pdf]

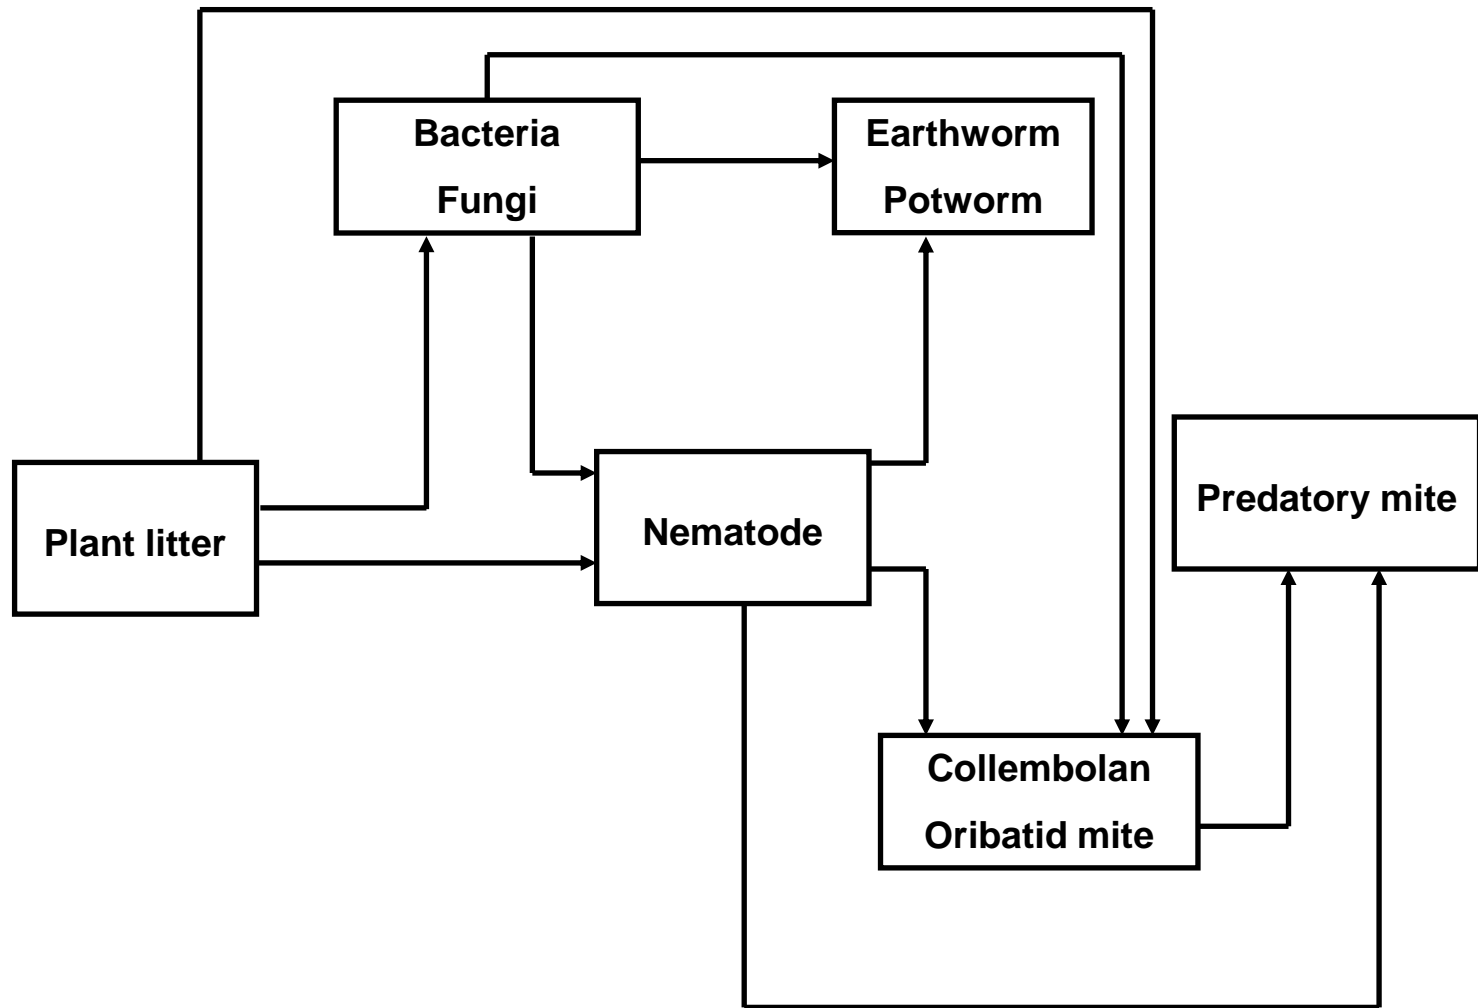

A diagram of the hierarchy based on the current knowledge of soil invertebrates revealing the relationship among collembolan, nematode, potworm, earthworm, oribatid mite and predatory mite in the food web.
